# Supplementary material for: Biology of an Adventive Population of the Armored Scale Rhizaspidiotus donacis, a Biological Control Agent of Arundo donax in California
Source: MDPI journal article supplement (doi:10.3390/insects12070588), 2021-06-29
Supplement: s1 [file s1]

**Table S1.** Estimates of evolutionary divergence among sequences. The number of base differences per site from between sequences are shown. This analysis involved 22 nucleotide sequences. All ambiguous positions were removed for each sequence pair (pairwise deletion option). There were a total of 782 positions in the final dataset. Evolutionary analyses were conducted in MEGA X (Kumar et al. 2018)

|                                | Villafran<br>queza<br>Sp | Vingrau,<br>France | Las<br>Cañas,<br>Sp | Alcoy,<br>Sp | La P.<br>de C.,<br>Sp | Velez<br>de B.,<br>Sp | La<br>Bern.,<br>Sp | Ebro<br>River,<br>Sp | Onda,<br>Spain | Vil.<br>Catalan,<br>Fr | Coloma,<br>Sp | Rive<br>saltes<br>Fr | Do.<br>Lucata,<br>It | Do.<br>Lucata,<br>It | Mar. di<br>Noto,<br>It | River<br>saltes,<br>Fr | P.<br>Ammos,<br>Gr | Lefkanti,<br>Gr | Nea<br>Artaki,<br>Gr | Peristeri,<br>Gr | P.<br>Ammos,<br>Gr |
|--------------------------------|--------------------------|--------------------|---------------------|--------------|-----------------------|-----------------------|--------------------|----------------------|----------------|------------------------|---------------|----------------------|----------------------|----------------------|------------------------|------------------------|--------------------|-----------------|----------------------|------------------|--------------------|
| Villafrankeza, Spain           |                          |                    |                     |              |                       |                       |                    |                      |                |                        |               |                      |                      |                      |                        |                        |                    |                 |                      |                  |                    |
| Vingrau, France                | 0.00128                  |                    |                     |              |                       |                       |                    |                      |                |                        |               |                      |                      |                      |                        |                        |                    |                 |                      |                  |                    |
| Las Cañas, Spain               | 0.00128                  | 0.00000            |                     |              |                       |                       |                    |                      |                |                        |               |                      |                      |                      |                        |                        |                    |                 |                      |                  |                    |
| Alcoy, Spain                   | 0.00128                  | 0.00000            | 0.00000             |              |                       |                       |                    |                      |                |                        |               |                      |                      |                      |                        |                        |                    |                 |                      |                  |                    |
| La Puebla de Cazalla,<br>Spain | 0.00128                  | 0.00000            | 0.00000             | 0.00000      |                       |                       |                    |                      |                |                        |               |                      |                      |                      |                        |                        |                    |                 |                      |                  |                    |
| Velez de Benaudalla,<br>Spain  | 0.00128                  | 0.00000            | 0.00000             | 0.00000      | 0.00000               |                       |                    |                      |                |                        |               |                      |                      |                      |                        |                        |                    |                 |                      |                  |                    |
| La Bernadilla, Spain           | 0.00128                  | 0.00000            | 0.00000             | 0.00000      | 0.00000               | 0.00000               |                    |                      |                |                        |               |                      |                      |                      |                        |                        |                    |                 |                      |                  |                    |
| Ebro River, Spain              | 0.00255                  | 0.00128            | 0.00128             | 0.00128      | 0.00128               | 0.00128               | 0.00128            |                      |                |                        |               |                      |                      |                      |                        |                        |                    |                 |                      |                  |                    |
| Onda, Spain                    | 0.00255                  | 0.00128            | 0.00128             | 0.00128      | 0.00128               | 0.00128               | 0.00128            | 0.00255              |                |                        |               |                      |                      |                      |                        |                        |                    |                 |                      |                  |                    |
| Village Catalan, France        | 0.00255                  | 0.00128            | 0.00128             | 0.00128      | 0.00128               | 0.00128               | 0.00128            | 0.00255              | 0.00255        |                        |               |                      |                      |                      |                        |                        |                    |                 |                      |                  |                    |
| Coloma, Spain                  | 0.00128                  | 0.00000            | 0.00000             | 0.00000      | 0.00000               | 0.00000               | 0.00000            | 0.00128              | 0.00128        | 0.00128                |               |                      |                      |                      |                        |                        |                    |                 |                      |                  |                    |
| Rivesaltes, France             | 0.00128                  | 0.00000            | 0.00000             | 0.00000      | 0.00000               | 0.00000               | 0.00000            | 0.00128              | 0.00128        | 0.00128                | 0.00000       |                      |                      |                      |                        |                        |                    |                 |                      |                  |                    |
| Donna Lucata, Italy            | 0.03576                  | 0.03448            | 0.03448             | 0.03448      | 0.03448               | 0.03448               | 0.03448            | 0.03576              | 0.03321        | 0.03576                | 0.03448       | 0.03448              |                      |                      |                        |                        |                    |                 |                      |                  |                    |
| Donna Lucata, Italy            | 0.03576                  | 0.03448            | 0.03448             | 0.03448      | 0.03448               | 0.03448               | 0.03448            | 0.03576              | 0.03321        | 0.03576                | 0.03448       | 0.03448              | 0.00000              |                      |                        |                        |                    |                 |                      |                  |                    |
| Marina di Noto, Italy          | 0.03193                  | 0.03065            | 0.03065             | 0.03065      | 0.03065               | 0.03065               | 0.03065            | 0.03193              | 0.02937        | 0.03193                | 0.03065       | 0.03065              | 0.01660              | 0.01660              |                        |                        |                    |                 |                      |                  |                    |
| Rivesaltes, France             | 0.00128                  | 0.00000            | 0.00000             | 0.00000      | 0.00000               | 0.00000               | 0.00000            | 0.00128              | 0.00128        | 0.00128                | 0.00000       | 0.00000              | 0.03448              | 0.03448              | 0.03065                |                        |                    |                 |                      |                  |                    |
| Pohia Ammos, Greece            | 0.03448                  | 0.03321            | 0.03321             | 0.03321      | 0.03321               | 0.03321               | 0.03321            | 0.03448              | 0.03193        | 0.03448                | 0.03321       | 0.03321              | 0.01916              | 0.01916              | 0.00511                | 0.03321                |                    |                 |                      |                  |                    |
| Lefkanti, Greece               | 0.03448                  | 0.03321            | 0.03321             | 0.03321      | 0.03321               | 0.03321               | 0.03321            | 0.03448              | 0.03193        | 0.03448                | 0.03321       | 0.03321              | 0.01660              | 0.01660              | 0.00255                | 0.03321                | 0.00255            |                 |                      |                  |                    |
| Nea Artaki, Greece             | 0.03576                  | 0.03448            | 0.03448             | 0.03448      | 0.03448               | 0.03448               | 0.03448            | 0.03576              | 0.03321        | 0.03576                | 0.03448       | 0.03448              | 0.01788              | 0.01788              | 0.00383                | 0.03448                | 0.00383            | 0.00128         |                      |                  |                    |
| Peristeri, Greece              | 0.03448                  | 0.03321            | 0.03321             | 0.03321      | 0.03321               | 0.03321               | 0.03321            | 0.03448              | 0.03193        | 0.03448                | 0.03321       | 0.03321              | 0.01660              | 0.01660              | 0.00511                | 0.03321                | 0.00511            | 0.00255         | 0.00383              |                  |                    |
| Pachia Ammos, Greece           | 0.03448                  | 0.03321            | 0.03321             | 0.03321      | 0.03321               | 0.03321               | 0.03321            | 0.03448              | 0.03193        | 0.03448                | 0.03321       | 0.03321              | 0.01660              | 0.01660              | 0.00255                | 0.03321                | 0.00255            | 0.00000         | 0.00128              | 0.00255          |                    |
| California, USA                | 0.01022                  | 0.00894            | 0.00894             | 0.00894      | 0.00894               | 0.00894               | 0.00894            | 0.01022              | 0.01022        | 0.01022                | 0.00894       | 0.00894              | 0.03065              | 0.03065              | 0.02682                | 0.00894                | 0.02937            | 0.02937         | 0.03065              | 0.02937          | 0.02937            |
